# Supplementary material for: Ginsenoside Rg3 Attenuates Angiotensin II-Mediated Renal Injury in Rats and Mice by Upregulating Angiotensin-Converting Enzyme 2 in the Renal Tissue
Source: Hindawi journal article supplement (doi:10.1155/2019/6741057), 2019-11-29
Supplement: f1 [file 6741057.f1.pdf]

## Supplemental Material

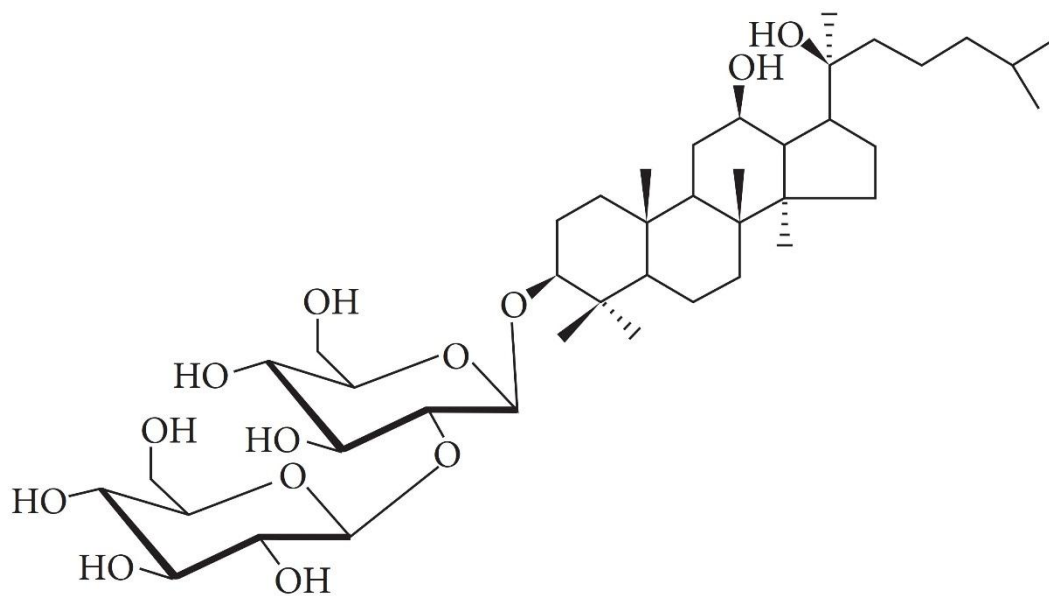

Supplemental Figure 1: The chemical structure of Rg3.
